# Supplementary material for: The Role of SUMO E3 Ligases in Signaling Pathway of Cancer Cells
Source: MDPI journal article supplement (doi:10.3390/ijms23073639), 2022-03-26
Supplement: s1 [file s1]

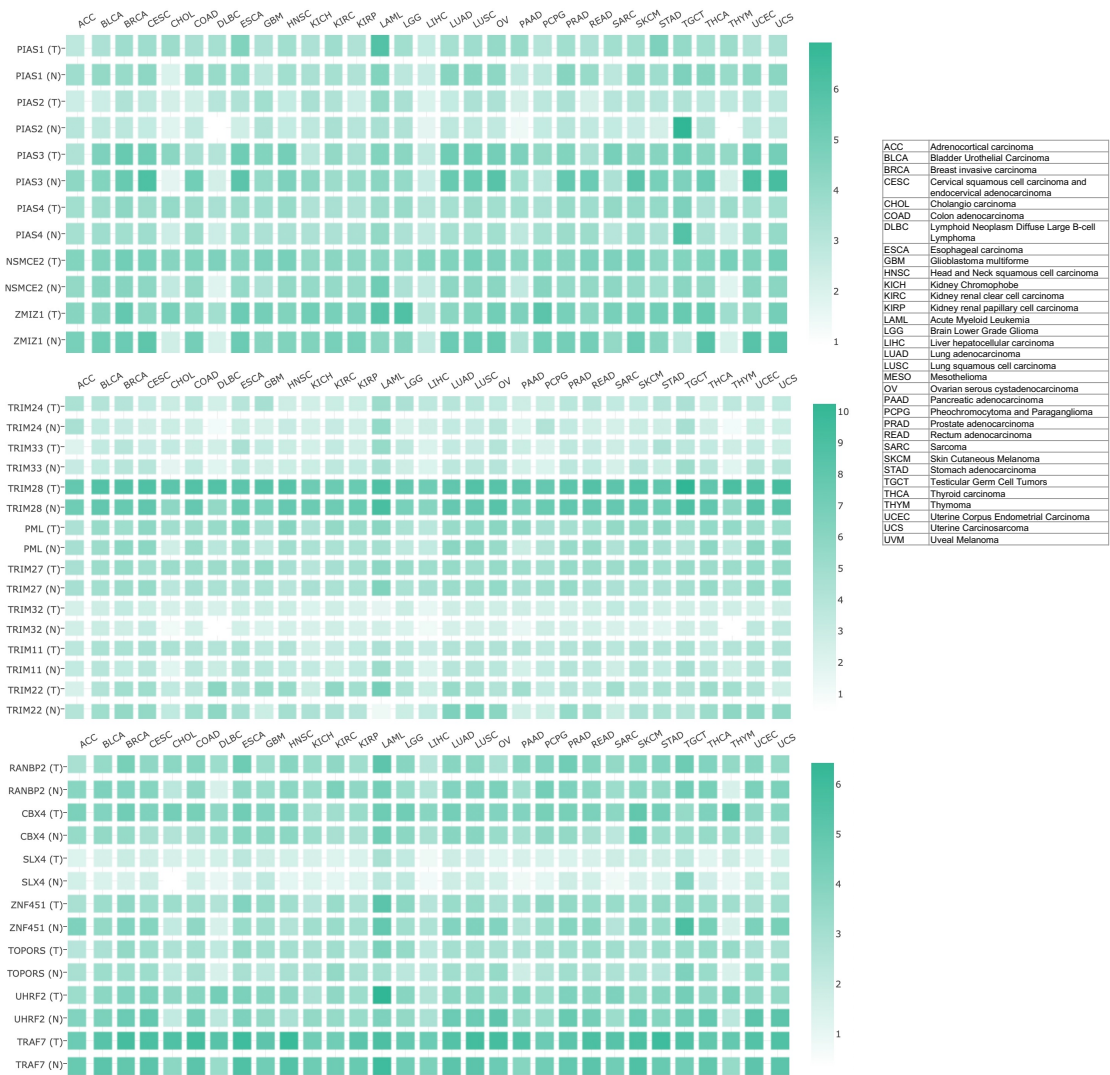

**Figure S1.** The expression level of SUMO E3 ligases in different cancers. The matrix The density of color represents the expression level. T means tumor tissues, and N represents normal tissues.
